# Supplementary material
Source: publisher site journal article supplement (https://www.dovepress.com/article/601389)
Supplement: Supplementary file 1 [file 601389%20Revised%20Supplementary%20materials.docx]

**Supplementary materials**

**Table S1.** Collinearity diagnostics of covariates in Cox model...................................................1

**Table S2.** Comparison of 5-year recompensation rates by KM and CIF methods......................2

**Table S3.** Comparison of Cox regression and Fine-Gray competing-risk regression.................3

**Table S4.** Association between Glasgow Prognostic Scores and recompensation: mixed-effects Cox regression accounting for hospital clustering................................................4

**Table S5.** Sensitivity analysis censoring patients at initiation of second-line therapies for the association between Glasgow Prognostic Scores and recompensation....................................5

**Table S6.** Bootstrap validation of time‑dependent AUCs for recompensation prediction at 60 months.......................................................................................................................................6

**Table S1. Collinearity diagnostics of covariates in Cox model**

| **Variable** | **Tolerance** | **VIF** |
| --- | --- | --- |
| TBIL | 0.834 | 1.199 |
| ALT | 0.254 | 3.932 |
| AST | 0.232 | 4.307 |
| ALP | 0.652 | 1.533 |
| GGT | 0.613 | 1.632 |
| AMA-M2 | 0.918 | 1.090 |
| GP210 | 0.938 | 1.066 |
| SP100 | 0.951 | 1.051 |

Note: ALP, alkaline phosphatase; ALT, alanine transaminase; AMA-M2, anti-mitochondrial antibody M2; AST, aspartate transaminase; GGT, gamma-glutamyl transferase; GP210, anti-gp210 antibody; SP100, anti-sp100 antibody; TBIL, total bilirubin; VIF, variance inflation factor.

.

### ****Table S2. Comparison of 5-year recompensation rates by KM and CIF methods****

| **Score** | **Group** | **KM 5-year rate (%)** | **CIF 5-year rate (%)** | **Absolute difference (%)** |
| --- | --- | --- | --- | --- |
| GPS | 0 | 53.9 | 52.9 | -1.0 |
| GPS | 1 | 22.2 | 18.0 | -4.2 |
| GPS | 2 | 3.9 | 2.3 | -1.6 |
| mGPS | 0 | 39.8 | 35.2 | -4.6 |
| mGPS | 1 | 17.0 | 13.3 | -3.7 |
| mGPS | 2 | 3.9 | 2.3 | -1.6 |
| hs-mGPS | 0 | 49.4 | 47.6 | -1.8 |
| hs-mGPS | 1 | 17.2 | 14.2 | -3.0 |
| hs-mGPS | 2 | 7.6 | 4.8 | -2.8 |

Note: CIF, cumulative incidence function; GPS, Glasgow Prognostic Score; hs‑mGPS, high‑sensitivity modified GPS; KM, Kaplan‑Meier; mGPS, modified GPS.

.

### ****Table S3. Comparison of Cox regression and Fine-Gray competing-risk regression****

| **Score** | **Model** | **HR / sHR** | **95% CI** | **P value** |
| --- | --- | --- | --- | --- |
| GPS | Cox | 0.283 | 0.208–0.385 | <0.001 |
| GPS | Fine‑Gray | 0.189 | 0.144–0.247 | <0.001 |
| mGPS | Cox | 0.316 | 0.211–0.474 | <0.001 |
| mGPS | Fine‑Gray | 0.238 | 0.164–0.345 | <0.001 |
| hs‑mGPS | Cox | 0.345 | 0.262–0.454 | <0.001 |
| hs‑mGPS | Fine‑Gray | 0.251 | 0.194–0.326 | <0.001 |

Note: CI, confidence interval; HR, hazard ratio; sHR, subdistribution hazard ratio.

.

**Table S4. Association between Glasgow Prognostic Scores and recompensation: mixed-effects Cox regression accounting for hospital clustering**

| **Variable** | **Multivariable analysis** | |
| --- | --- | --- |
| HR (95%CI) | *P*-value |
| GPS |  |  |
| 0 | Reference |  |
| 1 | 0.388（0.253-0.595） | < 0.001 |
| 2 | 0.057（0.018-0.181） | < 0.001 |
| p for trend | 0.320（0.225-0.457） | < 0.001 |
| mGPS |  |  |
| 0 | Reference |  |
| 1 | 0.361（0.162-0.806） | 0.013 |
| 2 | 0.078（0.024-0.250） | < 0.001 |
| p for trend | 0.302（0.186-0.490） | < 0.001 |
| hs-mGPS |  |  |
| 0 | Reference |  |
| 1 | 0.410（0.202-0.832） | 0.014 |
| 2 | 0.122（0.058-0.257） | < 0.001 |
| p for trend | 0.358（0.251-0.509） | < 0.001 |

Note: Adjusted for age, sex, BMI index, hypertension, diabetes mellitus, atherosclerosis, TBIL, ALT, AST, ALP, GGT, AMA-M2, SP100, GP210,with hospital site included as a random effect in a mixed-effects Cox model

**Table S5. Sensitivity analysis censoring patients at initiation of second-line therapies for the association between Glasgow Prognostic Scores and recompensation**

| **Variable** | **Univariate analysis** | | **Multivariable analysis** | | | | | |
| --- | --- | --- | --- | --- | --- | --- | --- | --- |
| Model A | | Model B | | Model C | |
| HR (95%CI) | P-value | HR (95%CI) | P-value | HR (95%CI) | P-value | HR (95%CI) | P-value |
| GPS | 0.275（0.199-0.381） | < 0.001 | 0.268（0.192-0.375） | < 0.001 | 0.254（0.182-0.355） | < 0.001 | 0.282（0.194-0.412） | < 0.001 |
| mGPS | 0.316（0.211-0.475） | < 0.001 | 0.317（0.211-0.478） | < 0.001 | 0.304（0.202-0.457） | < 0.001 | 0.285（0.172-0.471） | < 0.001 |
| hS-mGPS | 0.343（0.258-0.455） | < 0.001 | 0.337（0.252-0.451） | < 0.001 | 0.315（0.235-0.423） | < 0.001 | 0.337（0.234-0.484） | < 0.001 |

**Model A**: Adjusted for age, sex, BMI index.
**Model B**: Adjusted for all variables in Model A plus hypertension, diabetes mellitus, atherosclerosis.
**Model C**: Adjusted for all variables in Model B plus TBIL, ALT, AST, ALP, GGT, AMA-M2, SP100, and GP210.

**Table S6. Bootstrap validation of time‑dependent AUCs for recompensation prediction at 60 months**

| **Score** | **Original AUC** | **Bootstrap‑mean AUC** | **Bootstrap 95% CI** |
| --- | --- | --- | --- |
| GPS | 0.888 | 0.889 | 0.855–0.919 |
| mGPS | 0.795 | 0.795 | 0.754–0.834 |
| hs‑mGPS | 0.871 | 0.872 | 0.839–0.903 |

Note: Based on 1,000 bootstrap resamples with replacement. AUCs were calculated using the inverse probability of censoring weighting (IPCW) method at a fixed horizon of 60 months (5 years). The bootstrap‑corrected AUCs are nearly identical to the original estimates, indicating no overfitting and robust predictive performance.
